# Supplementary material for: Global Surgery Speaker Series: An Education and Advocacy Resource for the Advancement of Global Plastic Surgery
Source: PubMed Central journal article supplement — Plast Reconstr Surg Glob Open. 2024 Sep 10;12(9):e6144. doi: 10.1097/GOX.0000000000006144 (PMC11387043; doi:10.1097/gox.0000000000006144), 2024-09-10
Supplement: gox-12-e6144-s001.pdf [file gox-12-e6144-s001.pdf]

### SDC 1. List of Past Global Surgery Speaker Series Webinars

| Item No | Speaker                                       | Theme/Title                                                                                                 | Affiliation                                                           |
|---------|-----------------------------------------------|-------------------------------------------------------------------------------------------------------------|-----------------------------------------------------------------------|
| 1       | Dr. Barnabas Alayande, MBBS, MBA, PgDTh, FMCS | The vision of the Center for Equity in Global Surgery at the UGHE in improving surgical and anesthesia care | University of Global Health Equity                                    |
| 2       | Dr. Dennis Mazingi                            | Advancing global pediatric surgery                                                                          | Global Surgery, Anesthesia and Obstetrics Group, University of Oxford |
| 3       | Dr. Kee Park, MD, MPH                         | Advocacy in global surgery: the evolution, success, and gap                                                 | Program in Global Surgery and Social Change, Harvard Medical School   |
| 3       | Dr. Dominic Vervoort                          | The role of advocacy in global surgery                                                                      | University of Toronto                                                 |
| 4       | Prof. Micheal Goldwasser                      | Adapting elements of cleft care protocols in low-and middle-income countries during and after COVID-19      |                                                                       |
| 5       | Prof. Mark G. Shrime                          | Patient-centered, data-driven surgical scale-up: identifying solutions through research                     | Mercy Ships                                                           |
| 6       | Prof. Slaome Maswime                          | Leading Global Surgery in Africa                                                                            | University of Cape Town                                               |
| 7       | Dr. Denis A. Foretia                          | The future of global surgery in Africa                                                                      | Nkafu Policy Institute                                                |
| 8       | Dr. Vuyiseka Dubula-Majola                    | Successful community activism, the case of HIV/AIDS in South Africa                                         | Africa Centre for HIV/AIDS Management, Stellenbosch University        |

|    |                                                    |                                                                                                                                                                     |                                                                                            |
|----|----------------------------------------------------|---------------------------------------------------------------------------------------------------------------------------------------------------------------------|--------------------------------------------------------------------------------------------|
| 9  | Prof. John Nkrumah Mill                            | A friendly knife in the community                                                                                                                                   | NSOAP Technical Working Group, Ghana                                                       |
| 10 | Nobhojit Roy MD, MPH, PhD                          | The Work of the WHO's Integrated Health Services Department, Clinical Services and Systems Unit, and Opportunities for Collaboration with Operation                 | Surgery & Anaesthesia in the Clinical Services and Systems Unit, World Health Organization |
| 11 | Francisco Punina, Irma Romero, and Roberth Puertas | The rights of children in health care in Ecuador, national perspectives, and Operations Smile's relevance in this area.                                             | Operation Smile Ecuador                                                                    |
| 12 | Drs. Carolina Torres Perez-Iglesias and Emad Madha | Ecuador's National Surgical Obstetrics, and Anesthesia Plan, and their work with the Vice President's Office, Ministry of Public Health, and academic collaborators | Program in Global Surgery and Social Change, Harvard Medical School                        |
| 13 | Cate Oswald                                        | The advancements being made through Paul Farmer's legacy and the movement for the right to health                                                                   | Partners In Health                                                                         |
| 14 | Dr. Laura Hoemeke, DrPH, MPH                       | "Yes, and" win-win advocacy for global surgery—and global good                                                                                                      | Gillings School of Global Health, University of North Carolina                             |

|    |                                             |                                                                                                                                                                       |                                                                      |
|----|---------------------------------------------|-----------------------------------------------------------------------------------------------------------------------------------------------------------------------|----------------------------------------------------------------------|
| 15 | Prof. Faustin Ntirenganya, MD, MMED, FCS    | Working towards equity in global surgery for accessible, affordable, safe and sustainable surgical services: Experience from Rwanda plastic surgery capacity building | Department of Surgery, University of Rwanda                          |
| 16 | Andrew Leather MBBS MS FRCS FRCSEd (ad hom) | King's Global Health Partnership: Supporting health system strengthening                                                                                              | School of Life Course and Population Sciences, King's College London |
| 17 | Mark Sheehan, PhD                           | The Indispensable Role of Philosophy in Healthcare Resource Allocation                                                                                                | Oxford Biomedical Research Centre, University of Oxford              |
| 18 | Prof. Larry O.Akoko, MD, Mmed               | Building Health System Resilience: How Surgical Strengthening Can Improve Pandemic Preparedness                                                                       | Muhimbili University                                                 |
